# Supplementary figures and images for: Salinity Tolerance of Halophytic Grass Puccinellia nuttalliana Is Associated with Enhancement of Aquaporin-Mediated Water Transport by Sodium
Source: MDPI journal article supplement (doi:10.3390/ijms23105732), 2022-05-20

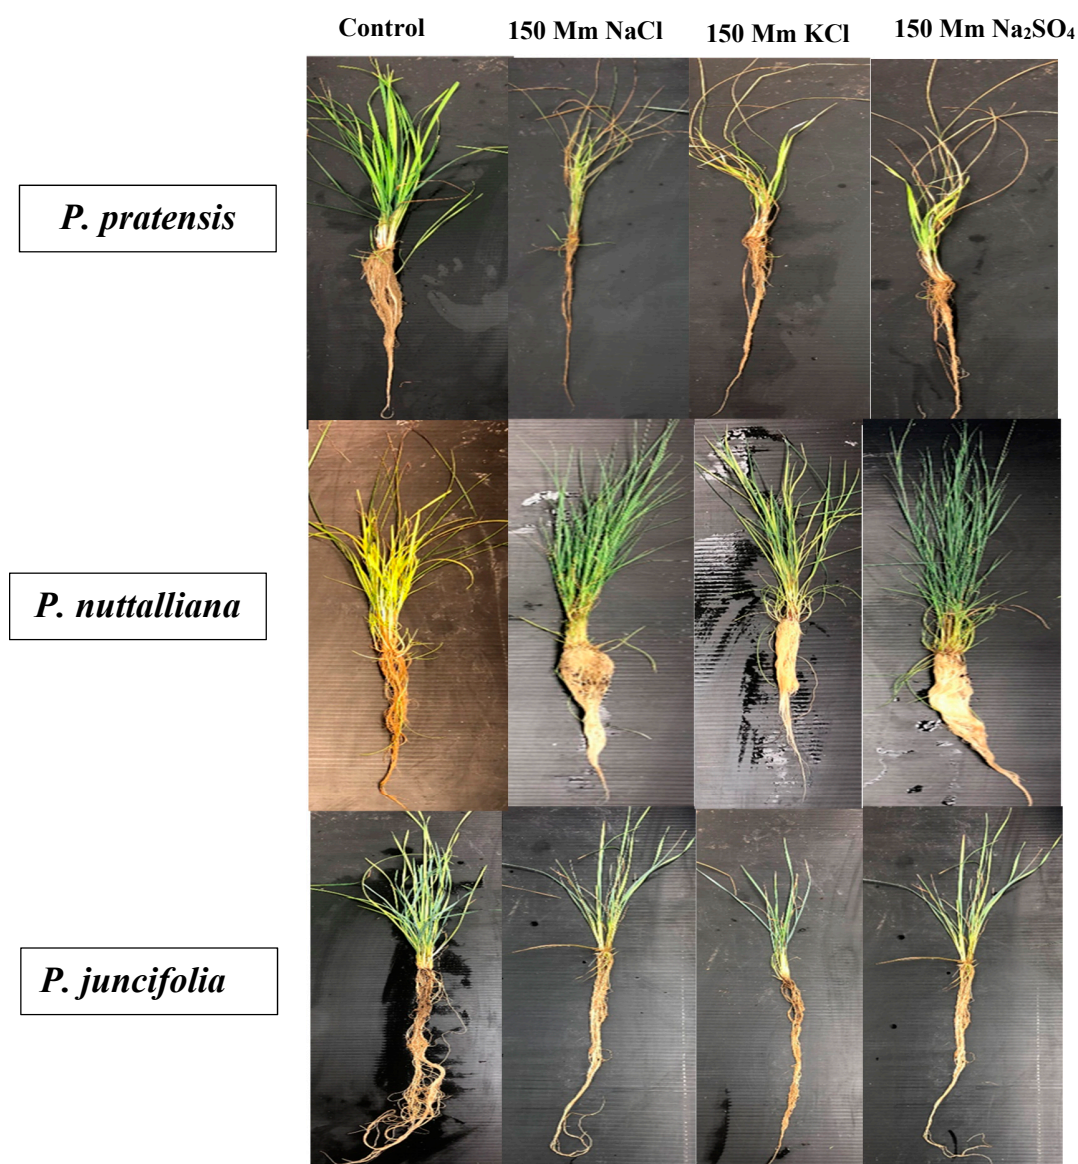

Supplementary Figure S1

Supplement: s1 [file s1]
